# Supplementary material
Source: Springer Nature journal article supplement (https://www.springermedizin.de/resource/supplementary/13075_2013_4049_MOESM11_ESM.pdf/10110322)

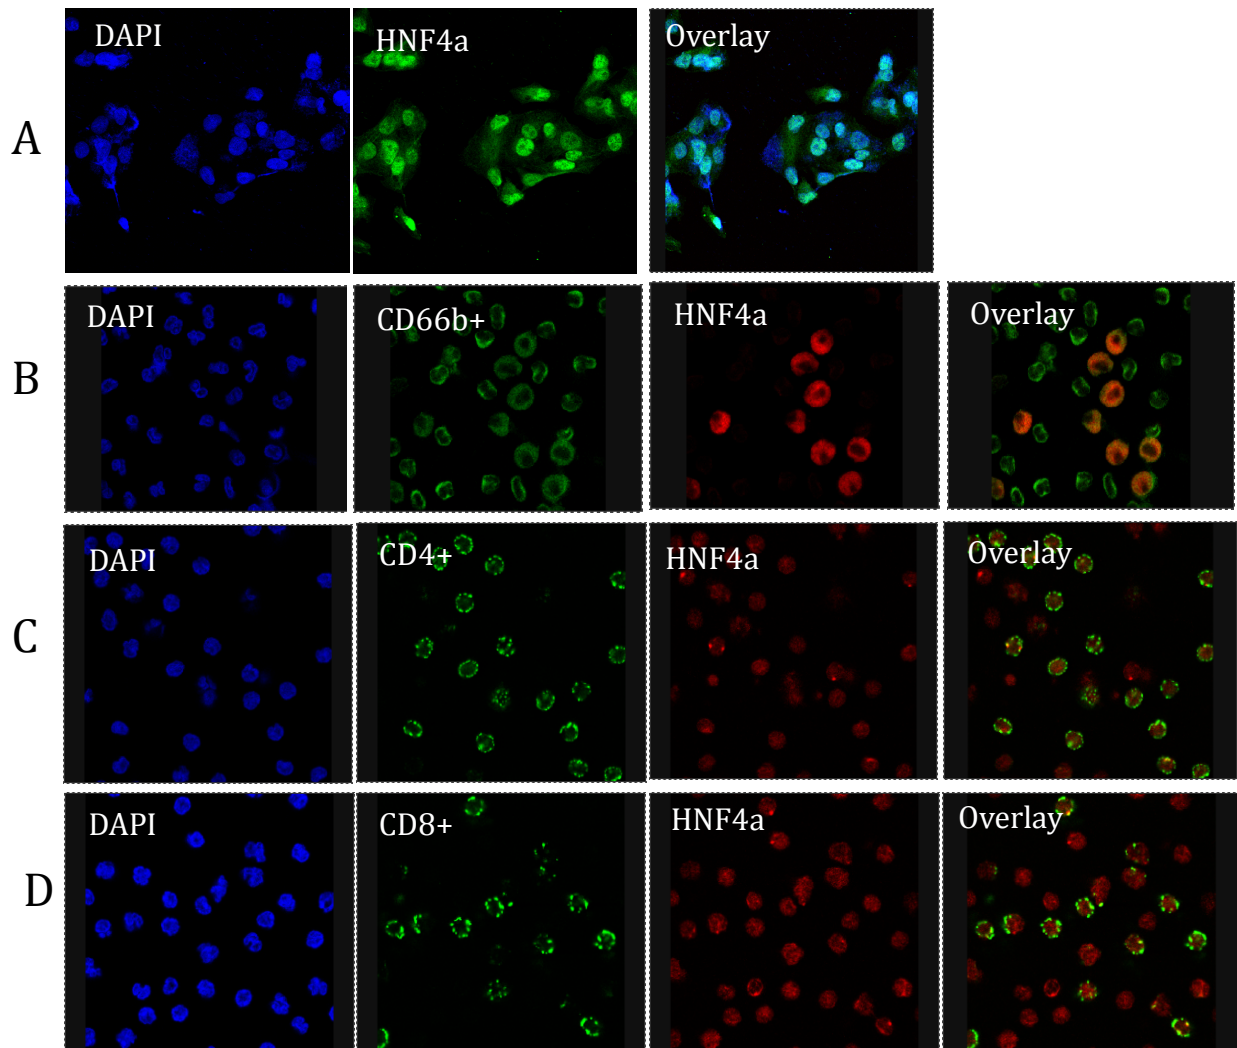

Supplement: MOESM11 [file 10110322]
